# Supplementary material for: Indoor Air Radon Concentration in Premises of Public Companies and Workplaces in Latvia
Source: MDPI journal article supplement (doi:10.3390/ijerph19041993), 2022-02-10
Supplement: s1 [file s1]

**Table S1.** Radon levels by municipality in Latvia (Bq/m<sup>3</sup>).

| Nr. | Municipality              | <i>n</i> | Mean   | SD     | Median | Q1  | Q3  | Min | Max |
|-----|---------------------------|----------|--------|--------|--------|-----|-----|-----|-----|
| 1   | Aglona Municipality       | 3        | 150.33 | 70.49  | 167    | 73  | -   | 73  | 211 |
| 2   | Aizkraukle Municipality   | 1        | 27.00  | -      | 27     | 27  | 27  | 27  | 27  |
| 3   | Aizpute Municipality      | 4        | 41.00  | 18.92  | 42     | 23  | 59  | 21  | 60  |
| 4   | Akniste Municipality      | 7        | 101.14 | 37.04  | 91     | 68  | 146 | 60  | 148 |
| 5   | Aloja Municipality        | 11       | 166.82 | 82.04  | 193    | 91  | 238 | 33  | 273 |
| 6   | Alsunga Municipality      | 4        | 61.50  | 20.82  | 61     | 43  | 80  | 43  | 81  |
| 7   | Aluksne Municipality      | 9        | 48.44  | 12.82  | 48     | 37  | 62  | 31  | 66  |
| 8   | Amata Municipality        | N/A      | N/A    | N/A    | N/A    | N/A | N/A | N/A | N/A |
| 9   | Ape Municipality          | 10       | 56.90  | 24.79  | 51     | 42  | 73  | 18  | 107 |
| 10  | Auce Municipality         | 5        | 113.20 | 52.08  | 89     | 69  | 170 | 66  | 170 |
| 11  | Adazi Municipality        | 10       | 53.00  | 29.58  | 44     | 27  | 77  | 18  | 101 |
| 12  | Babite Municipality       | 5        | 30.60  | 17.44  | 30     | 17  | 45  | 14  | 59  |
| 13  | Baldone Municipality      | 5        | 91.80  | 74.51  | 79     | 36  | 155 | 16  | 214 |
| 14  | Baltinava Municipality    | 4        | 77.00  | 7.44   | 79     | 69  | 83  | 67  | 84  |
| 15  | Balvi Municipality        | 4        | 70.25  | 10.81  | 73     | 59  | 79  | 55  | 80  |
| 16  | Bauska Municipality       | 8        | 95.13  | 50.33  | 80     | 49  | 148 | 43  | 174 |
| 17  | Beverina Municipality     | 8        | 54.00  | 28.76  | 49     | 30  | 67  | 28  | 115 |
| 18  | Broceni Municipality      | 4        | 6.75   | 6.29   | 5      | 3   | 13  | 2   | 16  |
| 19  | Burtnieki Municipality    | 9        | 44.78  | 40.53  | 22     | 17  | 65  | 10  | 137 |
| 20  | Carnikava Municipality    | 4        | 60.75  | 20.16  | 61     | 42  | 80  | 36  | 85  |
| 21  | Cesvaine Municipality     | 10       | 47.30  | 16.40  | 46     | 32  | 58  | 27  | 80  |
| 22  | Cesis Municipality        | 4        | 112.25 | 27.78  | 119    | 83  | 135 | 76  | 135 |
| 23  | Cibla Municipality        | 4        | 120.00 | 116.52 | 82     | 36  | 243 | 28  | 288 |
| 24  | Dagda Municipality        | 3        | 51.00  | 29.31  | 41     | 28  | -   | 28  | 84  |
| 25  | Daugavpils                | 30       | 66.23  | 69.73  | 41     | 25  | 92  | 14  | 359 |
| 26  | Daugavpils Municipality   | 8        | 59.25  | 38.42  | 44     | 30  | 100 | 25  | 124 |
| 27  | Dobele Municipality       | 9        | 66.89  | 42.65  | 69     | 23  | 108 | 19  | 128 |
| 28  | Dundaga Municipality      | N/A      | N/A    | N/A    | N/A    | N/A | N/A | N/A | N/A |
| 29  | Durbe Municipality        | N/A      | N/A    | N/A    | N/A    | N/A | N/A | N/A | N/A |
| 30  | Engure Municipality       | 1        | 62.00  | -      | 62     | 62  | 62  | 62  | 62  |
| 31  | Ergli Municipality        | 4        | 106.25 | 56.58  | 96     | 58  | 165 | 50  | 183 |
| 32  | Garkalne Municipality     | 5        | 30.60  | 9.45   | 27     | 24  | 40  | 23  | 46  |
| 33  | Grobina Municipality      | 8        | 76.38  | 40.90  | 66     | 51  | 80  | 43  | 172 |
| 34  | Gulbene Municipality      | 5        | 89.60  | 45.58  | 113    | 41  | 127 | 36  | 138 |
| 35  | Iecava Municipality       | 10       | 40.00  | 16.22  | 41     | 28  | 54  | 6   | 58  |
| 36  | Ilkskile Municipality     | N/A      | N/A    | N/A    | N/A    | N/A | N/A | N/A | N/A |
| 37  | Ilukste Municipality      | 10       | 108.10 | 116.92 | 54     | 41  | 171 | 30  | 393 |
| 38  | Incukalns Municipality    | 10       | 68.10  | 29.22  | 67     | 51  | 83  | 26  | 125 |
| 39  | Jaunjelgava Municipality  | 8        | 139.25 | 97.93  | 117    | 50  | 242 | 45  | 282 |
| 40  | Jaunpiebalga Municipality | 5        | 117.40 | 102.15 | 59     | 52  | 212 | 49  | 289 |
| 41  | Jaunpils Municipality     | N/A      | N/A    | N/A    | N/A    | N/A | N/A | N/A | N/A |
| 42  | Jelgava                   | 14       | 51.43  | 22.24  | 51     | 41  | 61  | 11  | 103 |
| 43  | Jelgava Municipality      | 8        | 92.88  | 45.41  | 87     | 55  | 134 | 25  | 157 |
| 44  | Jekabpils                 | 14       | 122.79 | 78.17  | 123    | 56  | 189 | 34  | 287 |
| 45  | Jekabpils Municipality    | 4        | 187.75 | 103.29 | 177    | 99  | 288 | 98  | 300 |
| 46  | Jurmala                   | 18       | 33.39  | 13.47  | 32     | 23  | 44  | 13  | 58  |
| 47  | Kandava Municipality      | N/A      | N/A    | N/A    | N/A    | N/A | N/A | N/A | N/A |
| 48  | Karsava Municipality      | N/A      | N/A    | N/A    | N/A    | N/A | N/A | N/A | N/A |
| 49  | Koceni Municipality       | N/A      | N/A    | N/A    | N/A    | N/A | N/A | N/A | N/A |
| 50  | Koknese Municipality      | N/A      | N/A    | N/A    | N/A    | N/A | N/A | N/A | N/A |
| 51  | Krimulda Municipality     | 5        | 86.40  | 43.95  | 88     | 44  | 128 | 41  | 146 |
| 52  | Kraslava Municipality     | 4        | 223.50 | 67.97  | 219    | 160 | 291 | 151 | 305 |
| 53  | Krustpils Municipality    | 4        | 80.75  | 39.79  | 96     | 39  | 108 | 23  | 109 |
| 54  | Kuldiga Municipality      | N/A      | N/A    | N/A    | N/A    | N/A | N/A | N/A | N/A |
| 55  | Kegums Municipality       | 5        | 33.00  | 3.39   | 33     | 30  | 36  | 29  | 38  |
| 56  | Kekava Municipality       | 19       | 51.79  | 45.40  | 31     | 22  | 84  | 17  | 190 |
| 57  | Lielvarde Municipality    | 9        | 43.33  | 26.56  | 37     | 21  | 65  | 12  | 93  |
| 58  | Liepaja                   | 28       | 55.29  | 44.57  | 42     | 23  | 84  | 10  | 227 |
| 59  | Ligatne Municipality      | 4        | 64.50  | 58.02  | 45     | 24  | 125 | 19  | 149 |

Table S1

|     |                          |     |        |        |     |     |     |     |     |
|-----|--------------------------|-----|--------|--------|-----|-----|-----|-----|-----|
| 60  | Limbazi Municipality     | 14  | 89.36  | 79.09  | 57  | 37  | 139 | 23  | 298 |
| 61  | Livani Municipality      | 4   | 55.50  | 3.70   | 55  | 52  | 59  | 52  | 60  |
| 62  | Lubana Municipality      | 5   | 62.20  | 18.65  | 71  | 45  | 75  | 31  | 76  |
| 63  | Ludza Municipality       | 7   | 46.57  | 47.55  | 38  | 9   | 57  | 8   | 144 |
| 64  | Madona Municipality      | 5   | 109.80 | 32.11  | 98  | 89  | 140 | 83  | 162 |
| 65  | Malpils Municipality     | 5   | 44.40  | 29.77  | 41  | 21  | 70  | 13  | 92  |
| 66  | Marupe Municipality      | 2   | 5.50   | 0.71   | 6   | 5   | -   | 5   | 6   |
| 67  | Mazsalaca Municipality   | 8   | 94.63  | 71.60  | 73  | 33  | 172 | 23  | 206 |
| 68  | Mersrags Municipality    | 5   | 97.20  | 74.21  | 104 | 26  | 165 | 13  | 199 |
| 69  | Nauksenu Municipality    | N/A | N/A    | N/A    | N/A | N/A | N/A | N/A | N/A |
| 70  | Nereta Municipality      | 8   | 129.13 | 75.07  | 116 | 87  | 143 | 52  | 299 |
| 71  | Nica Municipality        | 4   | 48.25  | 11.95  | 48  | 37  | 60  | 34  | 63  |
| 72  | Ogre Municipality        | N/A | N/A    | N/A    | N/A | N/A | N/A | N/A | N/A |
| 73  | Olaine Municipality      | 16  | 17.13  | 15.85  | 13  | 7   | 23  | 4   | 70  |
| 74  | Ozolnieki Municipality   | N/A | N/A    | N/A    | N/A | N/A | N/A | N/A | N/A |
| 75  | Pargauja Municipality    | 4   | 70.00  | 9.02   | 70  | 62  | 79  | 59  | 81  |
| 76  | Pavilosta Municipality   | 4   | 234.50 | 170.82 | 267 | 61  | 376 | 27  | 378 |
| 77  | Plavinas Municipality    | 12  | 78.50  | 23.26  | 73  | 68  | 88  | 45  | 126 |
| 78  | Preili Municipality      | 5   | 71.00  | 18.59  | 76  | 52  | 88  | 47  | 92  |
| 79  | Priekule Municipality    | 4   | 250.50 | 163.71 | 225 | 111 | 416 | 106 | 446 |
| 80  | Priekuli Municipality    | 4   | 77.00  | 34.47  | 80  | 44  | 107 | 32  | 116 |
| 81  | Rauna Municipality       | 4   | 333.00 | 122.49 | 352 | 208 | 439 | 169 | 460 |
| 82  | Rezekne                  | 22  | 119.68 | 84.04  | 98  | 61  | 160 | 14  | 374 |
| 83  | Rezekne Municipality     | 15  | 150.67 | 87.43  | 109 | 92  | 242 | 33  | 299 |
| 84  | Riebiņi Municipality     | N/A | N/A    | N/A    | N/A | N/A | N/A | N/A | N/A |
| 85  | Rīga                     | 144 | 32.74  | 31.86  | 25  | 14  | 41  | 2   | 279 |
| 86  | Roja Municipality        | 10  | 76.60  | 57.35  | 52  | 30  | 123 | 15  | 171 |
| 87  | Ropazi Municipality      | N/A | N/A    | N/A    | N/A | N/A | N/A | N/A | N/A |
| 88  | Rucava Municipality      | 4   | 44.25  | 26.13  | 45  | 20  | 68  | 12  | 76  |
| 89  | Rugāji Municipality      | 3   | 83.33  | 95.84  | 28  | 28  | -   | 28  | 194 |
| 90  | Rundale Municipality     | 5   | 41.40  | 15.34  | 48  | 26  | 54  | 22  | 59  |
| 91  | Rūjiena Municipality     | 6   | 87.33  | 58.08  | 81  | 38  | 129 | 27  | 182 |
| 92  | Salacgrīva Municipality  | 5   | 40.00  | 25.43  | 30  | 26  | 60  | 24  | 85  |
| 93  | Sala Municipality        | 8   | 74.25  | 33.36  | 75  | 43  | 98  | 33  | 130 |
| 94  | Salaspils Municipality   | 9   | 39.44  | 19.11  | 33  | 22  | 56  | 18  | 72  |
| 95  | Saldus Municipality      | 4   | 22.50  | 11.03  | 21  | 13  | 34  | 13  | 36  |
| 96  | Saulkrasti Municipality  | 4   | 35.50  | 1.73   | 35  | 34  | 37  | 34  | 38  |
| 97  | Seja Municipality        | N/A | N/A    | N/A    | N/A | N/A | N/A | N/A | N/A |
| 98  | Sigulda Municipality     | 8   | 94.50  | 33.45  | 98  | 62  | 121 | 52  | 147 |
| 99  | Skrīveri Municipality    | 7   | 97.29  | 69.02  | 67  | 43  | 146 | 33  | 224 |
| 100 | Skrunda Municipality     | 4   | 107.50 | 88.23  | 92  | 34  | 197 | 32  | 214 |
| 101 | Smiltene Municipality    | N/A | N/A    | N/A    | N/A | N/A | N/A | N/A | N/A |
| 102 | Stopiņi Municipality     | 11  | 40.91  | 22.58  | 32  | 21  | 63  | 17  | 82  |
| 103 | Strenci Municipality     | 9   | 34.44  | 22.61  | 29  | 13  | 56  | 11  | 74  |
| 104 | Talsi Municipality       | 16  | 55.00  | 50.87  | 42  | 24  | 63  | 1   | 199 |
| 105 | Tervete Municipality     | N/A | N/A    | N/A    | N/A | N/A | N/A | N/A | N/A |
| 106 | Tukums Municipality      | 13  | 68.08  | 47.46  | 58  | 37  | 95  | 18  | 199 |
| 107 | Vainode Municipality     | 4   | 51.75  | 9.03   | 53  | 43  | 60  | 40  | 61  |
| 108 | Valka Municipality       | N/A | N/A    | N/A    | N/A | N/A | N/A | N/A | N/A |
| 109 | Valmiera                 | 53  | 42.74  | 29.92  | 33  | 23  | 56  | 6   | 122 |
| 110 | Varakļani Municipality   | 8   | 148.38 | 80.27  | 113 | 95  | 234 | 52  | 273 |
| 111 | Varkava Municipality     | 3   | 18.33  | 7.02   | 19  | 11  | -   | 11  | 25  |
| 112 | Vecpiebalga Municipality | 5   | 83.00  | 60.81  | 79  | 35  | 134 | 23  | 182 |
| 113 | Vecumnieki Municipality  | 5   | 133.80 | 59.49  | 141 | 83  | 182 | 46  | 210 |
| 114 | Ventspils                | 15  | 50.63  | 25.20  | 29  | 20  | 42  | 6   | 102 |
| 115 | Ventspils Municipality   | 8   | 50.63  | 29.04  | 62  | 18  | 76  | 11  | 81  |
| 116 | Viesīte Municipality     | 8   | 97.63  | 50.42  | 74  | 57  | 153 | 56  | 180 |
| 117 | Vilaka Municipality      | 4   | 195.25 | 171.13 | 145 | 65  | 376 | 58  | 433 |
| 118 | Vilāni Municipality      | 4   | 139.50 | 83.32  | 129 | 66  | 224 | 61  | 240 |
| 119 | Zilupe Municipality      | 8   | 43.38  | 23.27  | 39  | 29  | 62  | 10  | 85  |

*n* – number of measurements; N/A – data not available.
